# Supplementary material for: Enhancement in Crystallizability of Poly(L-Lactide) Using Stereocomplex-Polylactide Powder as a Nucleating Agent
Source: MDPI journal article supplement (doi:10.3390/polym14194092), 2022-09-29
Supplement: s1 [file s1]

---

## Supplementary Materials

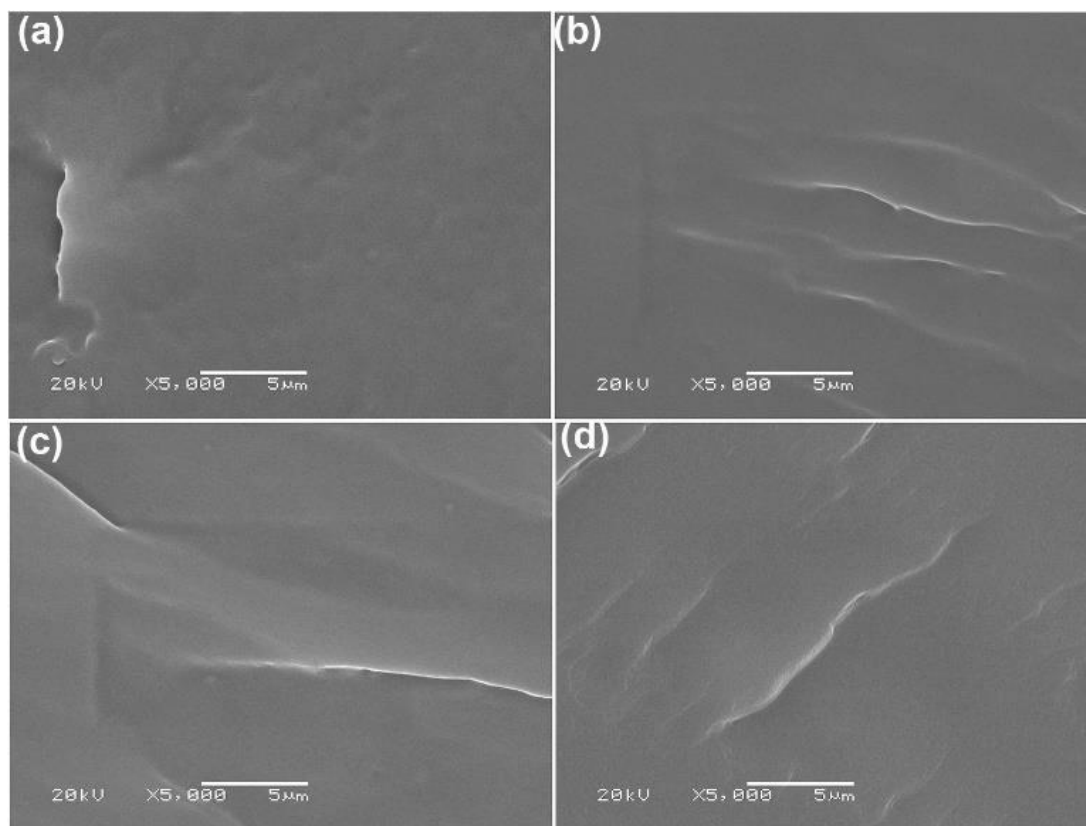

**Figure S1.** SEM images of cryogenically fractured surfaces of (a) pure PLLA3251D film and PLLA3251D/LMW-PLLA powder films with LMW-PLLA powder contents of (b) 2%, (c) 4%, and (d) 8% w/w (All bar scales = 5  $\mu\text{m}$ ).

---
